# Supplementary material
Source: PubMed Central journal article supplement (PMC3408738)
Supplement: JCI62368sd.pdf [file JCI62368sd.pdf]

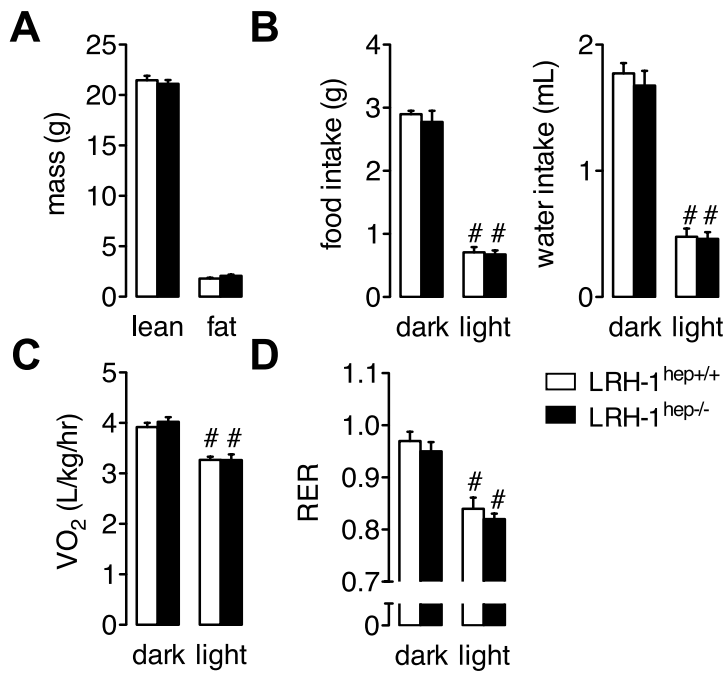

**Figure S1. Body composition, energy homeostasis and substrate utilization in LRH-1<sup>hep+/+</sup> (white bars) and LRH-1<sup>hep-/-</sup> (black bars) mice. (A)** Lean and fat masses, determined by EchoMRI. **(B)** Food and water intake during dark and light phases, determined by Comprehensive Lab Animal Monitoring (CLAMS). **(C)** Oxygen consumption during dark and light phases, determined by CLAMS. **(D)** Respiratory exchange ratio (RER) during dark and light phases, determined by CLAMS. Data represent means  $\pm$  SEM (n=8/genotype). # $p$ <0.05 versus dark.

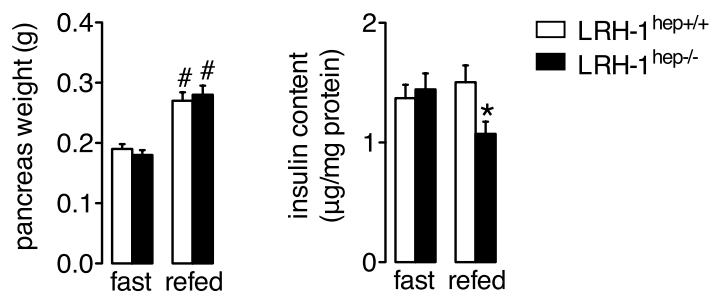

**Figure S2. Pancreas weight and pancreatic insulin content in 24-hour fasted and 6-hour refed LRH-1<sup>hep+/+</sup> (white bars) and LRH-1<sup>hep-/-</sup> (black bars) mice.** Data represent means  $\pm$  SEM (n=5-8/genotype). \*  $p < 0.05$  versus LRH-1<sup>hep+/+</sup>, #  $p < 0.05$  versus fast.

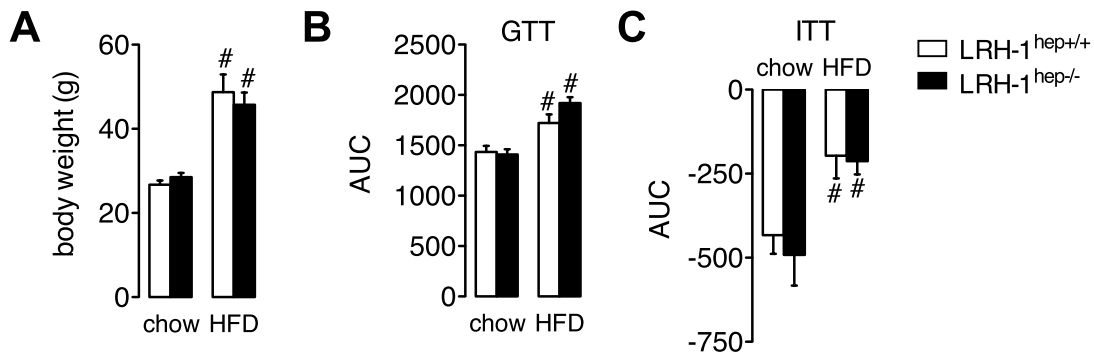

**Figure S3. High-fat feeding experiments in LRH-1<sup>hep+/+</sup> and LRH-1<sup>hep-/-</sup> mice.** (A) Body weight in chow and high-fat diet fed LRH-1<sup>hep+/+</sup> (white bars) and LRH-1<sup>hep-/-</sup> (black bars) mice after 26 weeks of dietary intervention. (B) Glucose AUC during oral glucose tolerance tests in chow and high-fat diet fed LRH-1<sup>hep+/+</sup> (white bars) and LRH-1<sup>hep-/-</sup> (black bars) mice. (C) Glucose AUC during intraperitoneal insulin tolerance tests in chow and high-fat diet fed LRH-1<sup>hep+/+</sup> (white bars) and LRH-1<sup>hep-/-</sup> (black bars) mice. Data represent means  $\pm$  SEM (n=5-9/genotype). <sup>#</sup>*p*<0.05 versus chow.

## Supplemental Methods

### Animal studies

Food and water intake, O<sub>2</sub> consumption and substrate utilization in LRH-1<sup>hep-/-</sup> and LRH-1<sup>hep+/+</sup> mice were monitored using the Comprehensive Lab Animal Monitoring System (CLAMS) (Columbus Instruments, Columbus, OH). Measurements were performed under a 12/12 hr dark/light cycle (lights on 7am-7pm) during 48 hours with ad libitum access to regular chow and drinking water. Prior to these measurements, lean and fat masses were quantified by EchoMRI, after which the animals were habituated in the CLAMS system during 24 hours.

For fasting-refeeding experiments, 24 hour-fasted LRH-1<sup>hep-/-</sup> and LRH-1<sup>hep+/+</sup> mice were sacrificed at 7am. Refed mice were fasted for 24 hours, starting at 7am, and were subsequently re-fed with normal chow diet during 6 hours. Animals were sacrificed by cardiac puncture under isoflurane anesthesia, and pancreas, gastrocnemius muscle, epididymal fat and hypothalamus were quickly snap-frozen. Pancreatic insulin was isolated as described (1) quantified by ELISA (Crystal Chem Inc.) and normalized for protein content (Lowry, BioRad). RNA isolated from muscle, fat and hypothalamus samples using Tri Reagent was subjected to qPCR analysis. Primer sequences are listed in Table S1. Gene expression levels were normalized for 36B4 (muscle and fat) or 18S (hypothalamus).

For high-fat feeding experiments, animals were fed either regular chow (Teklad #2016, Harlan) or a high-fat diet (D12330; Research Diets) during 26 weeks. Glucose tolerance tests were performed following an oral glucose bolus (2 g/kg) in 16-hour fasted mice (7pm-11am). Area under the curve (AUC) was calculated from blood glucose measurements at 0, 15, 30, 60, and 120 minutes. Insulin tolerance tests were performed following an intraperitoneal insulin bolus (0.75 U/kg) in 4-hour fasted mice (9am-1pm). Area under the curve (AUC) was calculated from blood glucose measurements at 0, 30, 60, 90, 120 and 150 minutes.

## References

1. Maida, A., Lovshin, J.A., Baggio, L.L., and Drucker, D.J. 2008. The glucagon-like peptide-1 receptor agonist oxyntomodulin enhances beta-cell function but does not inhibit gastric emptying in mice. *Endocrinology* 149:5670-5678.

**Supplemental Table 1. qPCR and ChIP primer sequences.**

| <b>Gene</b>     | <b>Forward primer</b>          | <b>Reverse primer</b>      |
|-----------------|--------------------------------|----------------------------|
| 18S             | GGGAGCCTGAGAAACGGC             | GGGTCGGGAGTGGGTAATTTT      |
| 36B4            | AGATTCGGGATATGCTGTTGG          | AAAGCCTGGAAGAAGGAGGTC      |
| Acc1            | GACAGACTGATCGCAGAGAAAG         | TGGAGAGCCCCACACACA         |
| Acc2            | CCCAGCCGAGTTTGTCACT            | GGCGATGAGCACCTTCTCTA       |
| Agrp            | GCGGAGGTGCTAGATCCACA           | AGGACTCGTGACGCCTTACAC      |
| B2mg            | TTCTGGTGCTTGTCTCACTG           | TATGTTCTGGCTTCCCATTCT      |
| ChREBP          | AAGCTAGGATTCGACACCCT           | CAGCGTTGAGCTCCTCTATT       |
| Cycs            | ACCAAATCTCCACGGTCTGTT          | TCCGAACACTCGAACTTCTCA      |
| Cyp8b1          | CAAAGCCCCAGCGCCT               | TTCGACTTCAAGCTGGTCGA       |
| Fas             | AGCTTCGGCTGCTGTTGGAAGT         | TCGGATGCCTCTGAACCACTCACA   |
| G6pdh           | GAACGCAAAGCTGAAGTGAGACT        | TCATTACGCTTGCACTGTTGGT     |
| Gck             | ACATTGTGCGCCGTGCCTGTGAA        | AGCCTGCGCACACTGGCGTGAAA    |
| Glut4           | ACTCTTGCCACACAGGCTCT           | CCTTGCCCTGTCAGGTATGT       |
| Hk1             | GAGGTCTACGACACCCCAGA           | GAAGTCTCCGAGGCATTGAG       |
| Hk2             | CCGCCGTGGTGGACAAGATA           | AGCAGTGATGAGAGCCGCTC       |
| Ldh             | ACTTGGCGGATGAGCTTGC            | TGCGTCAGTGCCCAGTTCTG       |
| Lrh-1           | TCATGCTGCCCAAAGTGGAGA          | TGGTTTTGGACAGTTCGCTT       |
| L-pk            | GGGCCGCATCTACATTGAC            | GTCCCTCTGGGCCAATTTT        |
| Npy             | CTCCGCTCTGCGACACTACA           | AATCAGTGTCTCAGGGCTGGA      |
| Pdk4            | GCA TTT CTA CTC GGA TGC TCA TG | CCA ATG TGG CTT GGG TTT CC |
| Pgc-1α          | TGAGCGAACCTTAAGTGTGGA          | CAAGAGGGCTTCAGCTTTGG       |
| Pomc            | ACCTCACCACGGAGAGCAAC           | GCGAGAGGTCGAGTTTGCA        |
| Scd1            | CCGGAGACCCCTTAGATCGA           | TAGCCTGTAAAAGATTTCTGCAAACC |
| Shp             | CTTTCTGGAGCCTTGAGCTGG          | GTTGAAGAGGATCGTGCCCTT      |
| Sr-b1           | TTGGCCTGTTTGTGTTGGGATG         | GGATTCGGGTGTCATGAAGG       |
| <b>Promoter</b> | <b>Forward primer</b>          | <b>Reverse primer</b>      |
| GCK1            | AGATGGCAAGTGATAGACAAG          | TGTGTATGCAAGCATGCGTG       |
| GCK2            | CACGCATGCTTGCATACACA           | GGGAGTGAGTAAACTGAAGG       |

|       |                               |                         |
|-------|-------------------------------|-------------------------|
| GCK3  | ATTCAGGCATGAGCTCAACC          | GTATGACAGGGTACATAGGG    |
| GCK4  | AGGTCTAGGAGGTGTCTGAA          | GAGAAGATTCAGGTCCTCTG    |
| GCK5  | AGCCTGTCTCATAGCCCTGT          | AGCCAAGGACTTCTGCACTA    |
| GCK6  | ATTAGTGCAGAAGTCCTTGG          | AAGTAGAGATGTTCTGACT     |
| GAPDH | AGTGCCAGCCTCGTCCCGTAGACAAAATG | AAGTGGGCCCCGGCCTTCTCCAT |

---
